# Supplementary material
Source: Springer Nature journal article supplement (https://www.springermedizin.de/resource/supplementary/12986_2007_120_MOESM3_ESM.pdf/25655408)

**HTase / PON1 Ratio**

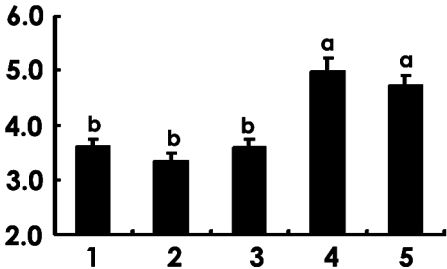

Supplement: MOESM3 [file 25655408]
